# Supplementary material for: Comparative Analysis of Codon Usage Bias in Chloroplast Genomes of eight Argentina Species of Rosaceae and Their Phylogeny
Source: Research Square preprint supplement (doi:10.21203/rs.3.rs-7501003/v1), 2025-09-19
Supplement: Supplementary file 1 [file 127aac4c483f89d16432d4b8.xlsx]

## Sheet: Sheet1
Table S4 RSCU values of each codon among eight species
Amino Acid	Codons	No.	A.anserina	A.cardotiana	A.leuconota	A.micropetala	A.parvula	A.phanerophlebia	A.smithiana	A.stenophylla
Phe	UUU	677	1.36	1.36	1.36	1.36	1.35	1.36	1.35	1.36
	UUC	439	0.64	0.64	0.64	0.64	0.65	0.64	0.65	0.64
Leu	UUA	637	2.05	2.05	2.1	2.04	2.05	2.04	2.04	2.05
	UUG	454	1.22	1.22	1.19	1.22	1.2	1.23	1.23	1.22
	CUU	455	1.27	1.26	1.26	1.26	1.25	1.24	1.26	1.26
	CUC	151	0.33	0.34	0.33	0.33	0.34	0.36	0.34	0.34
	CUA	294	0.76	0.75	0.75	0.76	0.75	0.75	0.74	0.75
	CUG	155	0.38	0.39	0.37	0.38	0.41	0.38	0.39	0.39
Ile	AUU	839	1.51	1.51	1.52	1.51	1.51	1.51	1.5	1.51
	AUC	382	0.53	0.56	0.54	0.56	0.55	0.56	0.56	0.56
	AUA	528	0.96	0.94	0.94	0.93	0.94	0.93	0.94	0.94
Val	GUU	410	1.46	1.48	1.48	1.48	1.47	1.47	1.47	1.48
	GUC	146	0.45	0.43	0.44	0.44	0.43	0.43	0.44	0.43
	GUA	409	1.54	1.53	1.53	1.53	1.55	1.54	1.53	1.53
	GUG	179	0.55	0.56	0.56	0.55	0.55	0.56	0.55	0.56
Ser	AGU	336	1.23	1.22	1.25	1.22	1.22	1.24	1.23	1.23
	AGC	89	0.4	0.4	0.4	0.41	0.41	0.4	0.4	0.4
	UCU	448	1.7	1.68	1.67	1.68	1.74	1.68	1.7	1.68
	UCC	273	0.94	0.96	0.94	0.96	0.94	0.96	0.95	0.97
	UCA	333	1.14	1.12	1.12	1.12	1.13	1.11	1.13	1.11
	UCG	153	0.58	0.61	0.62	0.61	0.57	0.61	0.59	0.61
Pro	CCU	350	1.53	1.51	1.54	1.51	1.51	1.51	1.52	1.53
	CCC	185	0.81	0.81	0.83	0.8	0.84	0.79	0.82	0.8
	CCA	258	1.1	1.09	1.09	1.09	1.07	1.08	1.08	1.09
	CCG	97	0.56	0.59	0.54	0.59	0.58	0.61	0.58	0.57
Thr	ACU	420	1.59	1.58	1.57	1.56	1.57	1.58	1.57	1.54
	ACC	211	0.77	0.8	0.77	0.8	0.8	0.78	0.79	0.82
	ACA	335	1.19	1.17	1.18	1.19	1.18	1.19	1.18	1.19
	ACG	111	0.45	0.45	0.48	0.45	0.45	0.44	0.46	0.45
Ala	GCU	534	1.83	1.81	1.84	1.82	1.83	1.8	1.83	1.84
	GCC	177	0.6	0.61	0.61	0.61	0.6	0.62	0.61	0.6
	GCA	341	1.11	1.11	1.11	1.1	1.1	1.09	1.1	1.09
	GCG	118	0.45	0.47	0.44	0.47	0.46	0.49	0.47	0.47
Tyr	UAU	616	1.62	1.63	1.62	1.63	1.62	1.62	1.62	1.62
	UAC	157	0.38	0.37	0.38	0.37	0.38	0.38	0.38	0.38
His	CAU	388	1.47	1.48	1.48	1.47	1.47	1.47	1.47	1.46
	CAC	129	0.53	0.52	0.52	0.53	0.53	0.53	0.53	0.54
Gln	CAA	544	1.53	1.53	1.54	1.54	1.54	1.54	1.53	1.53
	CAG	198	0.47	0.47	0.46	0.46	0.46	0.46	0.47	0.47
Asn	AAU	746	1.55	1.53	1.54	1.51	1.53	1.52	1.54	1.53
	AAC	218	0.45	0.47	0.46	0.49	0.47	0.48	0.46	0.47
Lys	AAA	756	1.55	1.54	1.54	1.54	1.54	1.54	1.54	1.54
	AAG	281	0.45	0.46	0.46	0.46	0.46	0.46	0.46	0.46
Asp	GAU	710	1.61	1.61	1.62	1.61	1.62	1.61	1.61	1.61
	GAC	179	0.39	0.39	0.38	0.39	0.38	0.39	0.39	0.39
Glu	GAA	820	1.5	1.51	1.5	1.5	1.49	1.51	1.5	1.49
	GAG	329	0.5	0.49	0.5	0.5	0.51	0.49	0.5	0.51
Cys	UGU	181	1.52	1.54	1.54	1.52	1.53	1.53	1.53	1.53
	UGC	56	0.48	0.46	0.46	0.48	0.47	0.47	0.47	0.47
Trp	UGG	376	1	1	1	1	1	1	1	1
Arg	AGA	383	1.76	1.72	1.72	1.69	1.74	1.72	1.74	1.74
	AGG	135	0.65	0.69	0.65	0.65	0.65	0.65	0.65	0.65
	CGU	284	1.36	1.32	1.34	1.34	1.33	1.34	1.34	1.33
	CGC	87	0.44	0.45	0.44	0.44	0.45	0.44	0.45	0.48
	CGA	305	1.37	1.38	1.4	1.39	1.35	1.38	1.38	1.33
	CGG	80	0.42	0.45	0.46	0.48	0.48	0.48	0.44	0.47
Gly	GGU	487	1.33	1.31	1.33	1.33	1.34	1.32	1.32	1.33
	GGC	148	0.48	0.49	0.47	0.48	0.47	0.49	0.48	0.48
	GGA	588	1.45	1.46	1.46	1.46	1.45	1.46	1.46	1.46
	GGG	234	0.75	0.74	0.74	0.73	0.74	0.74	0.74	0.73
