# Supplementary material for: Comparative Analysis of Codon Usage Bias in Chloroplast Genomes of eight Argentina Species of Rosaceae and Their Phylogeny
Source: Research Square preprint supplement (doi:10.21203/rs.3.rs-7501003/v1), 2025-09-19
Supplement: Supplementary file 2 [file 98c291200039f8c44bd51818.xlsx]

## Sheet: Sheet1
Table S5 The information of species used for phylogenetic analysis in this study
Genus	Species	Accesssion Number
Argentina	A. parvula	OR863707
	A. polyphylla	OR863702
	A. lineata	OQ992657
	A. festiva	OR86369
	A. taliensis	OR863704
	A. stenophylla var. emergens	OR863706
	A. microphylla	OR863698
	A. stenophylla	PX057651
	A. leuconota var. leuconota	PX057650
	A. leuconota var. brachyphyllaria	OR863693
	A. peduncularis	OR863699
	A. fallens	OR863690
	A. gombalana	MW307907
	A. cardotiana	OR863689
	A. phanerophlebia	OR863700
	A. micropetala	OR863696
	A. anserina	PX057649
	A. smithiana	MW307911
Potentilla	P. indica	MK134678
	P. acaulis	MW338688
	P. chinensis var. chinensis	MW338695
Note: The species with bold were sequenced in this study.
