# Supplementary material for: Comparative Analysis of Codon Usage Bias in Chloroplast Genomes of eight Argentina Species of Rosaceae and Their Phylogeny
Source: Research Square preprint supplement (doi:10.21203/rs.3.rs-7501003/v1), 2025-09-19
Supplement: Supplementary file 3 [file a5d09af917d9058972a12a74.docx]

| Function of Genes | Group of Genes | Gene name |
| --- | --- | --- |
| Photosynthesis | Photosystem Ⅰ | *psaA*, *psaB*, *psaC*, *psaI*, *psaJ* |
| Photosystem Ⅱ | *psbA*, *psbB*, *psbC*, *psbD*, *psbE*, *psbF*, *psbH*, *psbI*, *psbJ*, *psbK*, *psbL*, *psbM*, *psbN*, *psbT*, *psbZ* |
| Cytochrome b/f complex | *petA, petB*a*, petD*a*, petG, petL, petN* |
| ATP synthase | *atpA, atpB, atpE, atpF, atpH, atpI* |
| NADH-dehydrogenase | *ndhA*a*, ndhB**a*, ndhC, ndhD, ndhE, ndhF, ndhG, ndhH, ndhI, ndhJ, ndhK* |
| Large subunit Rubisco | *rbcL* |
| Protein synthesis and DNA-replication | Subunits of RNA polymerase | *rpoA, rpoB, rpoC1*a*, rpoC2* |
| Ribosomal protein small subunit | *rps2*, *rps3*, *rps4*, *rps7**, *rps8*, *rps11*, *rps12**b, *rps14*, *rps15*, *rps16*a, *rps18*, *rps19* |
| Ribosomal protein large subunit | *rpl2**a, *rpl14*, *rpl16*a, *rpl20*, *rpl22*, *rpl23**, *rpl32*, *rpl33*, *rpl36* |
| Transfer RNAs | *trnA-UGC**a, *trnC-GCA*, *trnD-GUC*, *trnE-UUC*, *trnF-GAA*, *trnfM-CAU*, *trnG-GCC*, *trnG-UCC*a, *trnH-GUG*, *trnI-CAU**, *trnI-GAU**a, *trnK-UUU*a, *trnL-CAA**, *trnL-UAA*a, *trnL-UAG*, *trnM-CAU*, *trnN-GUU**, *trnP-UGG*, *trnQ-UUG*, *trnR-ACG**, *trnR-UCU*, *trnS-GCU*, *trnS-GGA*, *trnS-UGA*, *trnT-GGU*, *trnT-UGU*, *trnV-GAC**, *trnV-UAC*a, *trnW-CCA*, *trnY-GUA* |
| Ribosomal RNAs | *rrn4.5**, *rrn5**, *rrn16**, *rrn23** |
| Other genes | Maturase | *matK* |
| C-type cytochrome synthesis gene | *ccsA* |
| Acetyl-CoA-carboxylase | *accD* |
| Inner membrane protein | *cemA* |
| ATP-dependent protease | *clpP*b |
| Genes of unknown function | Conserved hypothetical gene | *ycf1*, *ycf2**, *ycf3*b, *ycf4* |

Table S2 The gene information of three *Argentina* species cp genomes

Note: * indicates the number of repeat units is 2; aGene contains a single intron; bGene contains two introns
