# Supplementary material for: Comparative Analysis of Codon Usage Bias in Chloroplast Genomes of eight Argentina Species of Rosaceae and Their Phylogeny
Source: Research Square preprint supplement (doi:10.21203/rs.3.rs-7501003/v1), 2025-09-19
Supplement: Supplementary file 4 [file aa826a9adb18e7de7e55dbca.docx]

Table S1 The information of eight *Argentina* species cp genomes

| Species | Gene Number | | | Length (bp) | | | | GC content (%) | | | |
| --- | --- | --- | --- | --- | --- | --- | --- | --- | --- | --- | --- |
| PCG | rRNA | tRNA | Genome | LSC | SSC | IR | Genome | LSC | SSC | IR |
| *Argentina anserina* | 84 | 8 | 37 | 155,148 | 85,068 | 18,676 | 25,702 | 36.74 | 34.52 | 30.71 | 42.60 |
| *A. cardotiana* | 84 | 8 | 37 | 156,725 | 86,049 | 18,704 | 25,986 | 37.01 | 34.85 | 31.10 | 42.72 |
| *A. leuconota* | 84 | 8 | 37 | 155,709 | 84,425 | 17,892 | 26,696 | 37.06 | 35.02 | 31.03 | 42.31 |
| *A. micropetala* | 84 | 8 | 37 | 156,563 | 85,947 | 18,608 | 26,004 | 37.07 | 34.90 | 31.27 | 42.72 |
| *A. parvula* | 84 | 8 | 37 | 156,318 | 85,493 | 18,911 | 25,957 | 37.04 | 34.93 | 30.91 | 42.74 |
| *A. phanerophlebia* | 84 | 8 | 37 | 155,504 | 85,619 | 18,461 | 25,712 | 37.11 | 34.98 | 31.16 | 42.79 |
| *A. smithiana* | 84 | 8 | 37 | 156,753 | 86,034 | 18,719 | 26,000 | 37.03 | 34.88 | 31.10 | 42.73 |
| *A. stenophylla* | 84 | 8 | 37 | 155,972 | 85,222 | 18,766 | 25,992 | 37.15 | 35.02 | 31.18 | 42.79 |
