# Supplementary material for: Comparative Analysis of Codon Usage Bias in Chloroplast Genomes of eight Argentina Species of Rosaceae and Their Phylogeny
Source: Research Square preprint supplement (doi:10.21203/rs.3.rs-7501003/v1), 2025-09-19
Supplement: Supplementary file 5 [file d28a6123068219cfe93a1e7a.docx]

Table S3 Codon usage bias related parameters of eight *Argentina* species

| Species | A3s % | T3s % | C3s % | G3s % | GCall % | GC1 % | GC2 % | GC3 % |
| --- | --- | --- | --- | --- | --- | --- | --- | --- |
| *A. anserina* | 43.17 | 47.25 | 16.66 | 18.04 | 37.80 | 45.98 | 37.78 | 29.43 |
| *A. cardotiana* | 42.91 | 46.98 | 16.90 | 18.33 | 38.00 | 46.07 | 37.89 | 29.84 |
| *A. leuconota* | 43.05 | 47.26 | 16.68 | 18.12 | 37.90 | 46.04 | 37.88 | 29.53 |
| *A. micropetala* | 42.89 | 46.95 | 16.94 | 18.28 | 38.00 | 46.11 | 37.92 | 29.85 |
| *A. parvula* | 42.86 | 47.12 | 16.88 | 18.26 | 37.90 | 46.05 | 37.85 | 29.76 |
| *A. phanerophlebia* | 42.90 | 46.93 | 16.96 | 18.31 | 38.00 | 46.04 | 37.91 | 29.87 |
| *A. smithiana* | 42.90 | 47.04 | 16.90 | 18.27 | 38.00 | 46.06 | 37.87 | 29.79 |
| *A. stenophylla* | 42.80 | 46.95 | 16.97 | 18.34 | 38.00 | 46.15 | 37.88 | 29.92 |
